# Supplementary material for: An automated Design-Build-Test-Learn pipeline for enhanced microbial production of fine chemicals
Source: PubMed Central journal article supplement (PMC6123781; doi:10.1038/s42003-018-0076-9), 2018-06-08
Supplement: 42003_2018_76_MOESM1_ESM.pdf [file 42003_2018_76_MOESM1_ESM.pdf]

**Supplementary Table 1.** Plasmids used in the pinocembrin study.

| Plasmid reference | Description (replication origin – antibiotic resistance – pathway promoter/gene organization)              |
|-------------------|------------------------------------------------------------------------------------------------------------|
| pQlinkNHHHL       | ColE1-AmpR-P <sub>T5</sub> -AtPAL-P <sub>T5</sub> -Sc4CL-P <sub>T5</sub> -AtCHS-P <sub>T5</sub> -AtIChi*   |
| SBC001040         | p15A-AmpR-PlacUV5-AtIChi-AtPAL-P <sub>trc</sub> -Sc4CL-PlacUV5-AtCHS**                                     |
| SBC001041         | p15A-AmpR-P <sub>trc</sub> -AtIChi-AtPAL-Sc4CL-AtCHS                                                       |
| SBC001042         | p15A-AmpR-PlacUV5-AtPAL-Sc4CL-PlacUV5-AtCHS-P <sub>trc</sub> -AtIChi                                       |
| SBC001043         | p15A-AmpR-P <sub>trc</sub> -AtPAL-Sc4CL-AtCHS-AtIChi                                                       |
| SBC001044         | p15A-AmpR-PlacUV5-AtCHS-P <sub>trc</sub> -AtIChi-AtPAL-Sc4CL                                               |
| SBC001045         | pSC101-AmpR-P <sub>trc</sub> -AtCHS-AtIChi-P <sub>trc</sub> -AtPAL-Sc4CL                                   |
| SBC001046         | pSC101-AmpR-P <sub>trc</sub> -Sc4CL-AtCHS-PlacUV5-AtIChi-AtPAL                                             |
| SBC001047         | pSC101-AmpR-PlacUV5-AtPAL-PlacUV5-Sc4CL-P <sub>trc</sub> -AtCHS-AtIChi                                     |
| SBC001048         | pSC101-AmpR-PlacUV5-Sc4CL-AtCHS-AtIChi-PlacUV5-AtPAL                                                       |
| SBC001049         | p15A-AmpR-P <sub>trc</sub> -Sc4CL-P <sub>trc</sub> -AtCHS-P <sub>trc</sub> -AtIChi-P <sub>trc</sub> -AtPAL |
| SBC001050         | pSC101-AmpR-P <sub>trc</sub> -AtPAL-P <sub>trc</sub> -Sc4CL-AtCHS-PlacUV5-AtIChi                           |
| SBC001051         | pSC101-AmpR-PlacUV5-AtIChi-P <sub>trc</sub> -AtPAL-PlacUV5-Sc4CL-AtCHS                                     |
| SBC001052         | p15A-AmpR-PlacUV5-Sc4CL-PlacUV5-AtCHS-AtIChi-AtPAL                                                         |
| SBC001053         | pSC101-AmpR-P <sub>trc</sub> -AtIChi-PlacUV5-AtPAL-Sc4CL-P <sub>trc</sub> -AtCHS                           |
| SBC001054         | p15A-AmpR-P <sub>trc</sub> -AtCHS-PlacUV5-AtIChi-PlacUV5-AtPAL-PlacUV5-Sc4CL                               |
| SBC001055         | pSC101-AmpR-PlacUV5-AtCHS-AtIChi-AtPAL-P <sub>trc</sub> -Sc4CL                                             |

|           |                                                                  |
|-----------|------------------------------------------------------------------|
| SBC003338 | ColE1-AmpR-Ptrc-AtIcHI-Sc4CL-AtCHS-Ptrc-AtPAL                    |
| SBC003350 | ColE1-AmpR-Ptrc-AtIcHI-Ptrc-Sc4CL-AtCHS-Ptrc-AtPAL               |
| SBC003353 | ColE1-AmpR-Ptrc-AtIcHI-Ptrc-Sc4CL-Ptrc-AtCHS-Ptrc-AtPAL          |
| SBC003354 | ColE1-AmpR-Ptrc-AtIcHI-Ptrc-Sc4CL-PlacUV5-AtCHS-Ptrc-AtPAL       |
| SBC003358 | ColE1-AmpR-Ptrc-AtIcHI-PlacUV5-Sc4CL-Ptrc-AtCHS-Ptrc-AtPAL       |
| SBC003360 | ColE1-AmpR-Ptrc-AtIcHI-AtCHS-Sc4CL-Ptrc-AtPAL                    |
| SBC003364 | ColE1-AmpR-Ptrc-AtIcHI-AtCHS-Ptrc-Sc4CL-Ptrc-AtPAL               |
| SBC003372 | ColE1-AmpR-Ptrc-AtIcHI-Ptrc-AtCHS-Ptrc-Sc4CL-Ptrc-AtPAL          |
| SBC003373 | ColE1-AmpR-Ptrc-AtIcHI-Ptrc-AtCHS-PlacUV5-Sc4CL-Ptrc-AtPAL       |
| SBC003376 | ColE1-AmpR-Ptrc-AtIcHI-PlacUV5-AtCHS-Ptrc-Sc4CL-Ptrc-AtPAL       |
| SBC003378 | ColE1-AmpR-PlacUV5-AtIcHI-Sc4CL-AtCHS-Ptrc-AtPAL                 |
| SBC003379 | ColE1-AmpR-PlacUV5-AtIcHI-Sc4CL-Ptrc-AtCHS-Ptrc-AtPAL            |
| SBC003381 | ColE1-AmpR-PlacUV5-AtIcHI-Ptrc-Sc4CL-AtCHS-Ptrc-AtPAL            |
| SBC003382 | ColE1-AmpR-PlacUV5-AtIcHI-Ptrc-Sc4CL-Ptrc-AtCHS-Ptrc-AtPAL       |
| SBC003383 | ColE1-AmpR-PlacUV5-AtIcHI-Ptrc-Sc4CL-PlacUV5-AtCHS-Ptrc-AtPAL    |
| SBC003384 | ColE1-AmpR-PlacUV5-AtIcHI-PlacUV5-Sc4CL-AtCHS-Ptrc-AtPAL         |
| SBC003385 | ColE1-AmpR-PlacUV5-AtIcHI-PlacUV5-Sc4CL-Ptrc-AtCHS-Ptrc-AtPAL    |
| SBC003386 | ColE1-AmpR-PlacUV5-AtIcHI-PlacUV5-Sc4CL-PlacUV5-AtCHS-Ptrc-AtPAL |
| SBC003387 | ColE1-AmpR-PlacUV5-AtIcHI-AtCHS-Sc4CL-Ptrc-AtPAL                 |

|           |                                                                |
|-----------|----------------------------------------------------------------|
| SBC003388 | ColE1-AmpR-PlacUV5-AtI CHI-AtCHS-Ptrc-Sc4CL-Ptrc-AtPAL         |
| SBC003389 | ColE1-AmpR-PlacUV5-AtI CHI-AtCHS-PlacUV5-Sc4CL-Ptrc-AtPAL      |
| SBC003391 | ColE1-AmpR-PlacUV5-AtI CHI-Ptrc-AtCHS-Ptrc-Sc4CL-Ptrc-AtPAL    |
| SBC003392 | ColE1-AmpR-PlacUV5-AtI CHI-Ptrc-AtCHS-PlacUV5-Sc4CL-Ptrc-AtPAL |
| SBC003393 | ColE1-AmpR-PlacUV5-AtI CHI-PlacUV5-AtCHS-Sc4CL-Ptrc-AtPAL      |
| SBC003394 | ColE1-AmpR-PlacUV5-AtI CHI-PlacUV5-AtCHS-Ptrc-Sc4CL-Ptrc-AtPAL |

\*Fehér *et al.*, 2014

\*\*Plasmid DNA sequences are available as entries in the ICE repository, e.g.

<https://ice.synbiochem.co.uk/entry/SBC001040>

#### Supplementary Table 2. Plasmids used in the reticuline/scoulerine study.

| Plasmid reference | Description (replication origin – antibiotic resistance – pathway promoter/gene organization) |
|-------------------|-----------------------------------------------------------------------------------------------|
| SBC000202         | BBR1-KanR-Ptrc-Cj6OMT-Ptrc-CjCNMT-Cj4OMT-PlacUV5-CjBBE                                        |
| SBC000203         | ColE1-KanR-PlacUV5-Cj6OMT-CjCNMT-PlacUV5-Cj4OMT-Ptrc-CjBBE                                    |
| SBC000204         | BBR1-KanR-Ptrc-CjBBE-PlacUV5-Cj6OMT-CjCNMT-Ptrc-Cj4OMT                                        |
| SBC000205         | BBR1-KanR-PlacUV5-Cj6OMT-PlacUV5-CjCNMT-Ptrc-Cj4OMT-CjBBE                                     |
| SBC000206         | ColE1-KanR-Ptrc-CjCNMT-Ptrc-Cj4OMT-Ptrc-CjBBE-Ptrc-Cj6OMT                                     |
| SBC000207         | ColE1-KanR-PlacUV5-CjBBE-Cj6OMT-Ptrc-CjCNMT-PlacUV5-Cj4OMT                                    |
| SBC000208         | BBR1-KanR-PlacUV5-CjCNMT-Cj4OMT-CjBBE-PlacUV5-Cj6OMT                                          |
| SBC000209         | ColE1-KanR-Ptrc-Cj4OMT-PlacUV5-CjBBE-PlacUV5-Cj6OMT-PlacUV5-CjCNMT                            |
| SBC000210         | BBR1-KanR-PlacUV5-Cj4OMT-CjBBE-Cj6OMT-Ptrc-CjCNMT                                             |
| SBC000211         | BBR1-KanR-Ptrc-CjCNMT-Cj4OMT-PlacUV5-CjBBE-Cj6OMT                                             |
| SBC000212         | ColE1-KanR-PlacUV5-Cj4OMT-Ptrc-CjBBE-Cj6OMT-CjCNMT                                            |
| SBC000213         | ColE1-KanR-Ptrc-CjBBE-Cj6OMT-CjCNMT-Cj4OMT                                                    |
| SBC000214         | BBR1-KanR-PlacUV5-CjBBE-Ptrc-Cj6OMT-PlacUV5-CjCNMT-Cj4OMT                                     |

|           |                                                       |
|-----------|-------------------------------------------------------|
| SBC000215 | BBR1-KanR-Ptrc-Cj4OMT-CjBBE-Ptrc-Cj6OMT-CjCNMT        |
| SBC000216 | ColE1-KanR-PlacUV5-CjCNMT-PlacUV5-Cj4OMT-CjBBE-Cj6OMT |
| SBC000217 | ColE1-KanR-Ptrc-Cj6OMT-CjCNMT-Cj4OMT-CjBBE            |

**Supplementary Table 3.** DNA parts list used in the pinocembrin study.

| Part      | Class               | Description   | Uniprot code |
|-----------|---------------------|---------------|--------------|
| SBC000133 | Vector backbone     | pBbS1a        | n/a          |
| SBC000134 | Vector backbone     | pBbS5a        | n/a          |
| SBC000137 | Vector backbone     | pBbA1a        | n/a          |
| SBC000138 | Vector backbone     | pBbA5a        | n/a          |
| SBC000088 | Terminator-promoter | B1006-Ptrc    | n/a          |
| SBC000124 | Terminator-promoter | B1006-Ptrc    | n/a          |
| SBC000125 | Terminator-promoter | B1006-Ptrc    | n/a          |
| SBC000126 | Terminator-promoter | B1006-PlacUV5 | n/a          |
| SBC000127 | Terminator-promoter | B1006-PlacUV5 | n/a          |
| SBC000128 | Terminator-promoter | B1006-PlacUV5 | n/a          |
| SBC000096 | Gene                | AtPAL         | P35510       |
| SBC000099 | Gene                | Sc4CL         | Q9K3W1       |
| SBC000103 | Gene                | AtCHS         | P13114       |
| SBC000104 | Gene                | AtCHI         | Q9FKW3       |

**Supplementary Table 4.** DNA parts list used in the reticuline/scoulerine study.

| <b>Part</b> | <b>Class</b>        | <b>Description</b> | <b>Uniprot code</b> |
|-------------|---------------------|--------------------|---------------------|
| SBC000139   | Vector backbone     | pBbB1k             | n/a                 |
| SBC000140   | Vector backbone     | pBbB5k             | n/a                 |
| SBC000143   | Vector backbone     | pBbE1k             | n/a                 |
| SBC000144   | Vector backbone     | pBbE5k             | n/a                 |
| SBC000088   | Terminator-promoter | B1006-Ptrc         | n/a                 |
| SBC000124   | Terminator-promoter | B1006-Ptrc         | n/a                 |
| SBC000125   | Terminator-promoter | B1006-Ptrc         | n/a                 |
| SBC000126   | Terminator-promoter | B1006-PlacUV5      | n/a                 |
| SBC000127   | Terminator-promoter | B1006-PlacUV5      | n/a                 |
| SBC000128   | Terminator-promoter | B1006-PlacUV5      | n/a                 |
| SBC000120   | Gene                | Cj6OMT             | Q9LEL6              |
| SBC000121   | Gene                | CjCNMT             | Q948P7              |
| SBC000122   | Gene                | Cj4'OMT            | Q9LEL5              |
| SBC000112   | Gene                | CjBBE              | K0IQX2              |

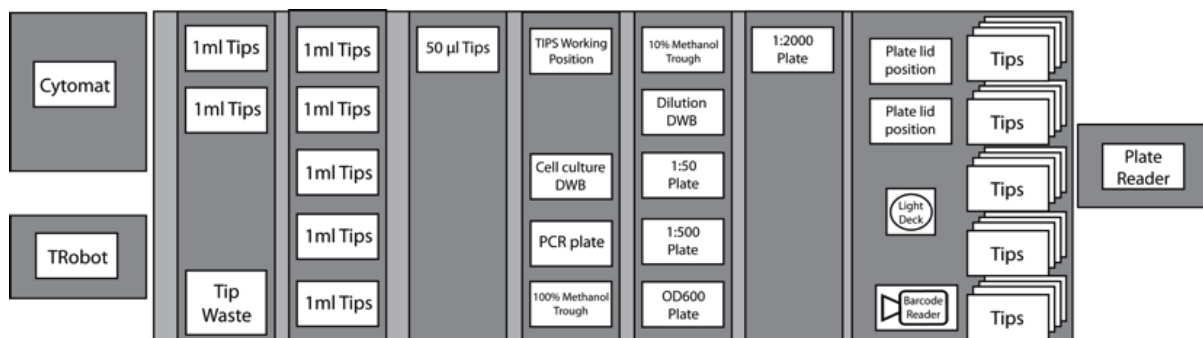

**Supplementary Fig. 1.** Hamilton Microlab STAR deck layout for automated extraction of samples for MS. Platform includes integrated Biometra TRobot (thermocycler), barcode reader, light deck for colony picking, CLARIOstar plate reader and temperature controlled cooling unit (Cytomat). All tip positions are standard 300µl nested racks unless stated. Labware positions include 3x destination sample plates 1:50, 1:500 and 1:2000, microtiter plate for OD<sub>600</sub> reads, PCR plate for initial quenching of reactions, deep-well block for sample dilution and 2x troughs containing 100% and 10% methanol. Briefly, an initial OD<sub>600</sub> measurement is taken using an integrated CLARIOstar plate reader before cells are quenched in 100% methanol. Samples are vortexed and centrifuged (off line) before diluting in 10% methanol up to a final ratio of 1:2000. Plates are sealed and run on a HTP-LC-MS/MS (QqQ) quantitative system.
